# Supplementary material for: Folding and Binding Mechanisms of the SH2 Domain from Crkl
Source: MDPI journal article supplement (doi:10.3390/biom12081014), 2022-07-22
Supplement: s1 [file s1]

**Table S1** Kinetic (un)folding parameters of the Crkl SH2 domain calculated at different Na<sub>2</sub>SO<sub>4</sub> concentrations.

| [Na <sub>2</sub> SO <sub>4</sub> ]<br>(M) | $k_{\text{IN}}$ (s <sup>-1</sup> ) | $k_{\text{NI}}$ (s <sup>-1</sup> ) | $K_{\text{IU}}$ |
|-------------------------------------------|------------------------------------|------------------------------------|-----------------|
| 0                                         | 26 ± 2                             | 0.0084 ± 0.0007                    | 0.0052 ± 0.0011 |
| 0.15                                      | 124 ± 9                            | 0.0030 ± 0.0003                    | 0.0013 ± 0.0003 |
| 0.3                                       | 150 ± 12                           | 0.0015 ± 0.0001                    | 0.0003 ± 0.0001 |

Note: The entire data set was globally fitted with Eq.2, sharing  $m_{\text{I-N}}$ ,  $m_{\text{N-I}}$  and  $m_{\text{I-D}}$  values:  $m_{\text{I-N}} = 0.28 \pm 0.05$  Kcal mol<sup>-1</sup> M<sup>-1</sup>,  $m_{\text{N-I}} = 1.00 \pm 0.01$  Kcal mol<sup>-1</sup> M<sup>-1</sup>,  $m_{\text{I-D}} = 2.60 \pm 0.05$  Kcal mol<sup>-1</sup> M<sup>-1</sup>. The global  $m_{\text{D-N}}$  value was  $3.9 \pm 0.7$  Kcal mol<sup>-1</sup> M<sup>-1</sup> calculated as the sum of  $m_{\text{I-N}}$ ,  $m_{\text{N-I}}$ , and  $m_{\text{I-D}}$ .

**Table S2.** Kinetic (un)folding parameters of the Crkl SH2 domain calculated at different pH conditions in presence of 0.15 M Na<sub>2</sub>SO<sub>4</sub>.

| pH  | $k_{IN}$ (s <sup>-1</sup> ) | $k_{NI}$ (s <sup>-1</sup> ) | $K_{ID}$        | $m_{N-I}$<br>(Kcal mol <sup>-1</sup> M <sup>-1</sup> ) | $m_{D-N}$<br>(Kcal mol <sup>-1</sup> M <sup>-1</sup> ) |
|-----|-----------------------------|-----------------------------|-----------------|--------------------------------------------------------|--------------------------------------------------------|
| 4.0 | 9 ± 5                       | 1.1490 ± 0.1543             | 0.2776 ± 0.2969 | 1.35 ± 0.04                                            | 4.13 ± 0.36                                            |
| 4.5 | 15 ± 1                      | 0.0927 ± 0.0106             | 0.0428 ± 0.0077 | 1.36 ± 0.03                                            | 4.14 ± 0.33                                            |
| 5.0 | 35 ± 5                      | 0.0192 ± 0.0019             | 0.0409 ± 0.0090 | 1.22 ± 0.02                                            | 4.00 ± 0.31                                            |
| 5.5 | 126 ± 17                    | 0.0049 ± 0.0004             | 0.0485 ± 0.0107 | 1.12 ± 0.01                                            | 3.91 ± 0.30                                            |
| 6.7 | 122 ± 11                    | 0.0040 ± 0.0005             | 0.0158 ± 0.0029 | 0.98 ± 0.02                                            | 3.76 ± 0.29                                            |
| 7.2 | 93 ± 8                      | 0.0036 ± 0.0005             | 0.0014 ± 0.0002 | 0.98 ± 0.02                                            | 3.76 ± 0.29                                            |
| 8.0 | 55 ± 5                      | 0.0034 ± 0.0005             | 0.0009 ± 0.0002 | 1.02 ± 0.02                                            | 3.80 ± 0.30                                            |
| 8.5 | 57 ± 5                      | 0.0059 ± 0.0009             | 0.0010 ± 0.0002 | 0.97 ± 0.02                                            | 3.75 ± 0.29                                            |
| 9.0 | 63 ± 6                      | 0.0110 ± 0.0016             | 0.0013 ± 0.0002 | 0.92 ± 0.02                                            | 3.70 ± 0.29                                            |

Note: The entire data set at different pH was globally fitted with Eq.2, sharing  $m_{I-N}$  and  $m_{I-D}$  values;  $m_{I-N}$  = 0.06 ± 0.06 Kcal mol<sup>-1</sup> M<sup>-1</sup>;  $m_{I-D}$  = 2.72 ± 0.05 Kcal mol<sup>-1</sup> M<sup>-1</sup>;  $m_{D-N}$  value =  $m_{I-N}$  +  $m_{N-I}$  +  $m_{I-D}$ .

**Table S3** Kinetics parameters obtained from pseudo-first order binding reaction between the wild-type Crkl SH2 domain and Pax<sub>112-123</sub> peptide, at different ionic strengths and 283K.

| [NaCl] (M) | $k_{\text{on}}$ ( $\mu\text{M}^{-1} \text{s}^{-1}$ ) | $k_{\text{off}}$ ( $\text{s}^{-1}$ ) | $K_{\text{D}}$ ( $\mu\text{M}$ ) |
|------------|------------------------------------------------------|--------------------------------------|----------------------------------|
| 0.15       | $45.9 \pm 2.2$                                       | $20.4 \pm 1.5$                       | $0.4 \pm 0.3$                    |
| 0.3        | $24.7 \pm 2.8$                                       | $21.8 \pm 1.1$                       | $0.9 \pm 0.7$                    |
| 0.5        | $10.4 \pm 1.4$                                       | $28.6 \pm 0.5$                       | $2.8 \pm 0.4$                    |
| 1          | $6.9 \pm 0.6$                                        | $39.6 \pm 4.0$                       | $5.8 \pm 0.7$                    |
